# Supplementary material
Source: PubMed Central journal article supplement (PMC9667825)
Supplement: PRO-31-e4460-s001.pdf [file PRO-31-e4460-s001.pdf]

**Allosteric links between the hydrophilic N-terminus and transmembrane core of human Na<sup>+</sup>/H<sup>+</sup> antiporter NHA2**

SUPPLEMENTARY MATERIAL

Diego Velázquez<sup>1</sup>, Vojtěch Průša<sup>1</sup>, Gal Masrati<sup>2</sup>, Elon Yariv<sup>2</sup>, Hana Sychrova<sup>1</sup>, Nir Ben-Tal<sup>2</sup>, Olga Zimmermannova<sup>1\*</sup>

<sup>1</sup>Laboratory of Membrane Transport, Institute of Physiology of the Czech Academy of Sciences, Prague 4, Czech Republic

<sup>2</sup>Department of Biochemistry and Molecular Biology, George S. Wise Faculty of Life Sciences, Tel-Aviv University, Tel-Aviv, Israel

\*corresponding author, e-mail: [olga.zimmermannova@fgu.cas.cz](mailto:olga.zimmermannova@fgu.cas.cz) (O.Z.)

E-mail addresses to other authors:

Diego Vélazquez (D.V.): [Diego.VelazquezSanchez@fgu.cas.cz](mailto:Diego.VelazquezSanchez@fgu.cas.cz)

Vojtěch Průša (V.P.): [prusavojta2003@gmail.com](mailto:prusavojta2003@gmail.com)

Gal Masrati (G.M.): [galmasrati@gmail.com](mailto:galmasrati@gmail.com)

Elon Yariv (E.Y.): [elonyariv@gmail.com](mailto:elonyariv@gmail.com)

Hana Sychrova (H.S.): [hana.sychrova@fgu.cas.cz](mailto:hana.sychrova@fgu.cas.cz)

Nir Ben-Tal (N.B-T.): [bental@tauex.tau.ac.il](mailto:bental@tauex.tau.ac.il)

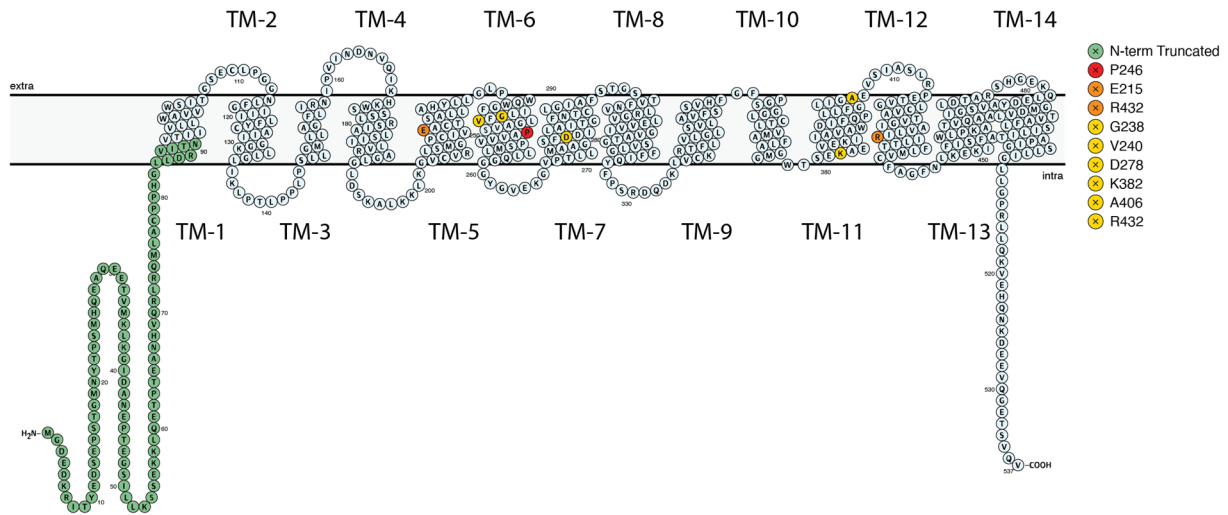

**Figure S1: The membrane topology of *HsNHA2*.** *HsNHA2* orientation in the membrane is shown in 2-dimensional representation with the extracellular matrix at the top and the cytoplasm at the bottom. Transmembrane helices are numbered 1-to-14. The N-terminus region, where various truncations were made, is colored green. The position of P246, which is involved in pH regulation, is highlighted in red, E215 and R432 that form a conserved salt bridge are colored orange, and the positions of other human variants are highlighted in yellow.

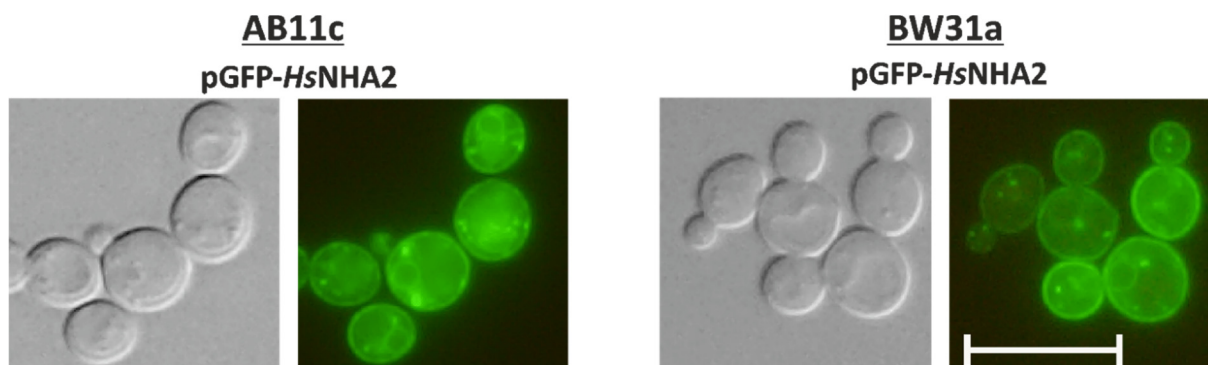

**Figure S2: Comparison of localization of GFP-HsNHA2 in two yeast backgrounds.** Transformants of AB11c (*ena1-4Δ nha1Δ nhx1Δ*) or BW31 (*ena1-4Δ nha1Δ*) expressing GFP-HsNHA2 from the pGFP-HsNHA2 plasmid were grown in YNB-Pro (4% glucose) to the exponential phase and observed under a fluorescence microscope (right). A Nomarski prism was used for whole-cell imaging (left). The scale bar corresponds to 10 μm.

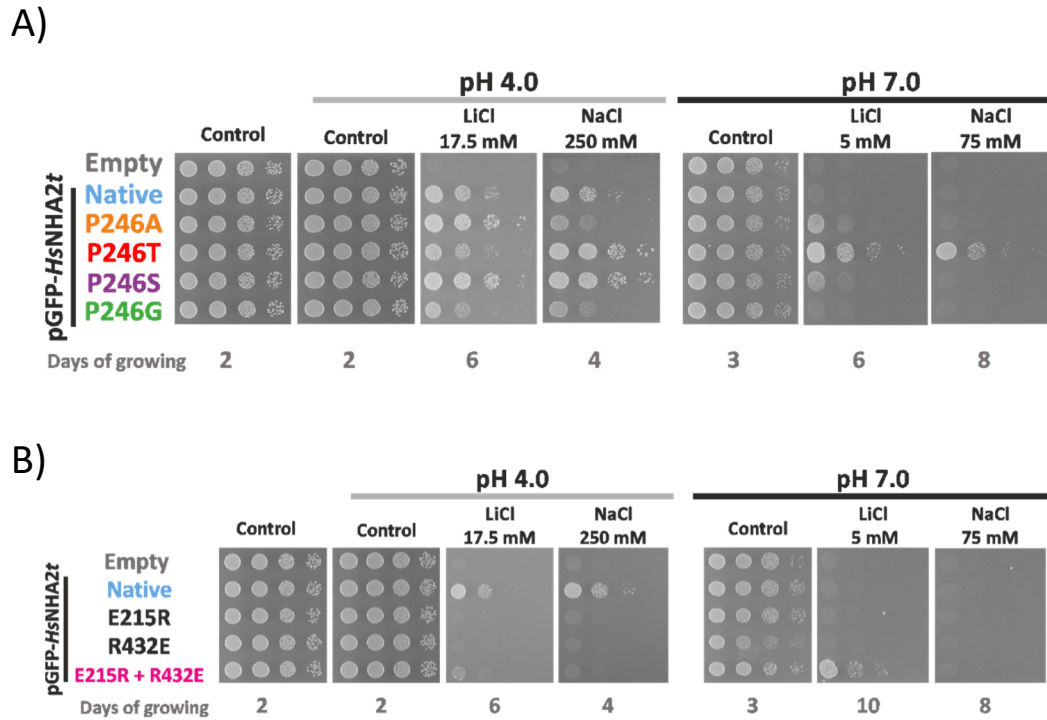

**Figure S3: N-terminal GFP-tagging does not change substrate specificity, but increases activity of *HsNHA2* mutated versions.** Salt tolerance of *S. cerevisiae* BW31 cells containing empty vector or expressing GFP-*HsNHA2* or one of four GFP-*HsNHA2* versions with single point mutations P246A, T, S or G (A) or versions E215R, R432E or E215R + R432E (B) from pGFP-*HsNHA2t* plasmid. Cells were grown on non-buffered YNB-Pro plates with the pH adjusted to 4.0 or 7.0 and supplemented with LiCl or NaCl as indicated. Plates were incubated at 30 °C and photographed on the indicated day.

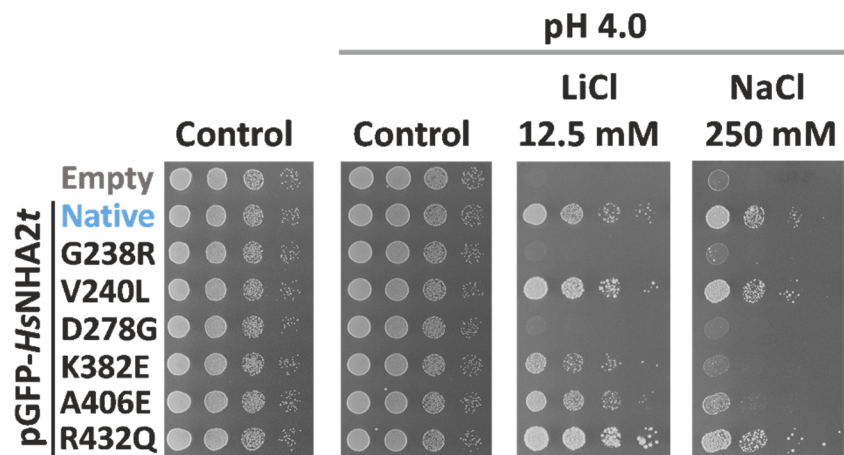

**Figure S4: N-terminal GFP-tagging does not change substrate specificity of *HsNHA2* versions with mutations that belong to known human SNPs.** The salt tolerance of *S. cerevisiae* BW31 cells containing the empty vector or expressing the native GFP-*HsNHA2* or one of six GFP-*HsNHA2* mutated versions - G238R, V240L, D278G, K382E, A406E and R432Q from the pGFP-*HsNHA2t* plasmid. Cells were grown on non-buffered YNB-Pro plates with the pH adjusted to 4.0 and supplemented with LiCl or NaCl as indicated. Growth was monitored for 2 (control) or 7 (LiCl or NaCl) days at 30°C.

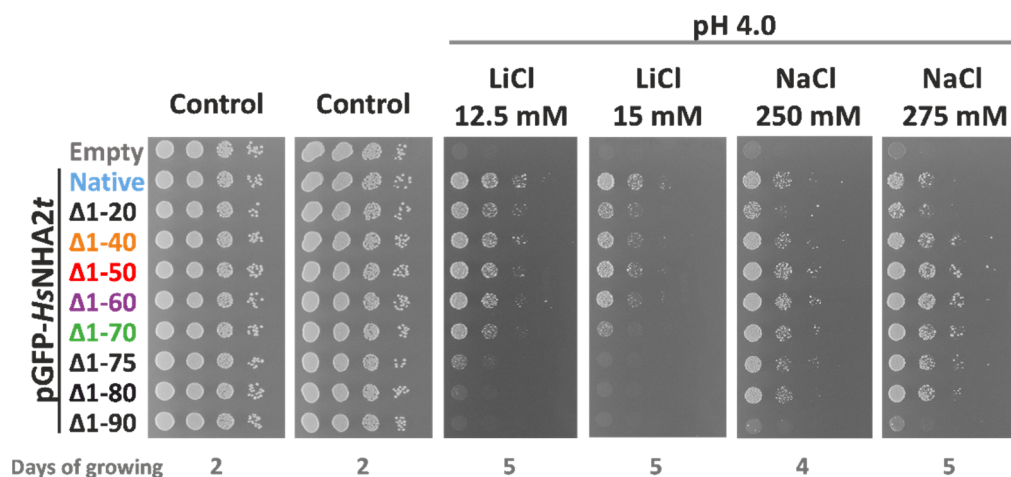

**Figure S5: N-terminal GFP-tagging altered LiCl tolerance provided by *HsNHA2* versions truncated at N-terminus.** The salt tolerance of *S. cerevisiae* BW31 cells containing the empty vector or expressing the tagged GFP-*HsNHA2* or N-terminal truncated GFP-*HsNHA2* versions from the pGFP-*HsNHA2t*. Cells were grown on non-buffered YNB-Pro plates with the pH adjusted to 4.0 and supplemented with LiCl or NaCl as indicated. Plates were incubated at 30 °C and photographed on the indicated day.

Table S1. Oligonucleotides used in this study

| Oligonucleotide                  | Sequence                                                                    | Use                                                |
|----------------------------------|-----------------------------------------------------------------------------|----------------------------------------------------|
| <i>Hs</i> NHA2-YEp-F             | GTACATTATAAAAAAAAAATCCTGAACTTAGCTAGATATTATGGGGGATGAAGATAAAAG                | <i>pHs</i> NHA2 and <i>pHs</i> NHA2t clonning      |
| <i>pNHA1</i> -GFP-F              | GTTTTTTGTACATTATAAAAAAAAAATCCTGAACTTAGCTAGATATTATGTCTAAAGGTGAAGAA<br>TTATTC | <i>pGFP-Hs</i> NHA2 and <i>pGFP-Hs</i> NHA2t       |
| <i>Hs</i> NHA2 TPS1 Term F       | CAAATAAAGATGAAGAAGTTCAAGGAGAGACTTCTGTGCAAGTTTAGTGAACCCGATGCAAA<br>TGAG      | <i>pHs</i> NHA2t and <i>pGFP-Hs</i> NHA2t clonning |
| <i>Hs</i> NHA2_TPS1 Term R       | GGACCAGGAATAGACGATCGTCTCATTGTCATCGGGTTCCTAACTTGCACAGAAGTCTC                 | <i>pHs</i> NHA2t and <i>pGFP-Hs</i> NHA2t clonning |
| TPS1_Term_Yep_R                  | GTCACGACGTTGTAACACGACGGCCAGTGCCAAGCTTGCATGTGTTTCAAGAAGAGATCAG               | <i>pHs</i> NHA2t and <i>pGFP-Hs</i> NHA2t clonning |
| <i>Hs</i> NHA2-P246A_Fw          | GGTGCTGTATCTGCAGCTGTTGTGGTG                                                 | Mutagenesis P246A                                  |
| <i>Hs</i> NHA2-P246A_Rev         | CACCACAACAGCTGCAGATACAGCACC                                                 | Mutagenesis P246A                                  |
| <i>Hs</i> NHA2-P246T_Fw          | GGTGCTGTATCTACAGCTGTTGTGGTG                                                 | Mutagenesis P246T                                  |
| <i>Hs</i> NHA2-P246T_Rev         | CACCACAACAGCTGTAGATACAGCACC                                                 | Mutagenesis P246T                                  |
| <i>Hs</i> NHA2-P246S_Fw          | GGTGCTGTATCTTACAGCTGTTGTGGTG                                                | Mutagenesis P246S                                  |
| <i>Hs</i> NHA2-P246S_Rev         | CACCACAACAGCTGAAGATACAGCACC                                                 | Mutagenesis P246S                                  |
| <i>Hs</i> NHA2_P246G_Fw          | GGTGCTGTATCTGGAGCTGTTGTGGTG                                                 | Mutagenesis P246G                                  |
| <i>Hs</i> NHA2_P246G_Rev         | CACCACAACAGCTCCAGATACAGCACC                                                 | Mutagenesis P246G                                  |
| <i>Hs</i> NHA2-E215R_Fw          | CCCTGTATTGTGCGGGCGTGCACATCT                                                 | Mutagenesis E215R and E215R + R432E                |
| <i>Hs</i> NHA2-E215R_Rev         | AGATGTGCACGCCGACACAATACAGGG                                                 | Mutagenesis E215R and E215R + R432E                |
| <i>Hs</i> NHA2-R432E_Fw          | GCAGTATTGATAGAAATTTGACTACA                                                  | Mutagenesis R432E and E215R + R432E                |
| <i>Hs</i> NHA2-R432E_Rev         | TGTAGTCAAATTTCTATCAATACTGC                                                  | Mutagenesis E215R and E215R + R432E                |
| <i>Hs</i> NHA2-G238R_Fw          | GGATTTATACTGCGTTTTGTTTAGGT                                                  | Mutagenesis G238R                                  |
| <i>Hs</i> NHA2-G238R_Rev         | ACCTAAAACAAAACGCAGTATAAATCC                                                 | Mutagenesis G238R                                  |
| <i>Hs</i> NHA2-V240L_Fw          | ATACTGGGTTTTCTTTAGGTGCTGTA                                                  | Mutagenesis V240L                                  |
| <i>Hs</i> NHA2-V240L_Rev         | TACAGCACCTAAAAGAAAACCCAGTAT                                                 | Mutagenesis V240L                                  |
| <i>Hs</i> NHA2-D278G_Fw          | GCTGGCAGCTTCGGTGACATTCTGGCC                                                 | Mutagenesis D278G                                  |
| <i>Hs</i> NHA2-D278G_Rev         | GGCCAGAATGTCACCGAAGCTGCCAGC                                                 | Mutagenesis D278G                                  |
| <i>Hs</i> NHA2-K382E_Fw          | TGGACCAGCGAAGAGGCAGAGGTTGAA                                                 | Mutagenesis K382E                                  |
| <i>Hs</i> NHA2-K382E_Rev         | TTCAACCTCTGCCTCTTCGCTGGTCCA                                                 | Mutagenesis K382E                                  |
| <i>Hs</i> NHA2-A406E_Fw          | GGACTAATTGGAGAAGAGGTATCTATT                                                 | Mutagenesis A406E                                  |
| <i>Hs</i> NHA2-A406E_Rev         | AATAGATACCTCTTCTCCAATTAGTCC                                                 | Mutagenesis A406E                                  |
| <i>Hs</i> NHA2-R432Q_Fw          | GCAGTATTGATACAAATTTGACTACA                                                  | Mutagenesis R432Q                                  |
| <i>Hs</i> NHA2-R432Q_Rev         | TGTAGTCAAATTTGTATCAATACTGC                                                  | Mutagenesis R432Q                                  |
| <i>Hs</i> NHA2 delta 1-20        | ACATTATAAAAAAAAAATCCTGAACTTAGCTAGATATTATGTACACGCCCTCCATGCATCA               | <i>pHs</i> NHA2t Δ1-20 clonning                    |
| <i>Hs</i> NHA2 delta 1-40        | ACATTATAAAAAAAAAATCCTGAACTTAGCTAGATATTATGGATGCAAATGAACCAACAGAAGGA           | <i>pHs</i> NHA2t Δ1-40 clonning                    |
| <i>Hs</i> NHA2 delta 1-50        | ACATTATAAAAAAAAAATCCTGAACTTAGCTAGATATTATGCTTCTGAAAAGCAGTGAAAAAAG            | <i>pHs</i> NHA2t Δ1-50 clonning                    |
| <i>Hs</i> NHA2 delta 1-60        | ACATTATAAAAAAAAAATCCTGAACTTAGCTAGATATTATGGAAAACCAACTGAAGCAAATCAC            | <i>pHs</i> NHA2t Δ1-60 clonning                    |
| <i>Hs</i> NHA2 delta 1-70 F      | ACATTATAAAAAAAAAATCCTGAACTTAGCTAGATATTATGAGACTGAGACAAATGCTGGC               | <i>pHs</i> NHA2t Δ1-70 clonning                    |
| <i>Hs</i> NHA2 delta 1-75        | ACATTATAAAAAAAAAATCCTGAACTTAGCTAGATATTATGCTGGCTTGCCTCCACA                   | <i>pHs</i> NHA2t Δ1-75 clonning                    |
| <i>Hs</i> NHA2 delta 1-80        | ACATTATAAAAAAAAAATCCTGAACTTAGCTAGATATTATGCATGGTTTACTGGACAGGGTC              | <i>pHs</i> NHA2t Δ1-80 clonning                    |
| <i>Hs</i> NHA2 delta 1-90        | ACATTATAAAAAAAAAATCCTGAACTTAGCTAGATATTATGGTTACCATCATTGTTCTTCTGTGG           | <i>pHs</i> NHA2t Δ1-90 clonning                    |
| <i>Hs</i> NHA2 delta 1-110       | ACATTATAAAAAAAAAATCCTGAACTTAGCTAGATATTATGCCTGGAGGAAACCTATTTGG               | <i>pHs</i> NHA2t Δ1-110 clonning                   |
| <i>GFP-Hs</i> NHA2 delta 1-20 F  | ATCCGGACTCAGATCTCGAGCTCAAGCTTCAATTCTATGTACACGCCCTCCATGCATCA                 | <i>pGFP-Hs</i> NHA2t Δ1-20 clonning                |
| <i>GFP-Hs</i> NHA2 delta 1-20 R  | CTGTCTCCTCTGTGCTTCTTGATGCATGGAGGGCGTGTACATAGAATTCGAAGCTTGAGCT               | <i>pGFP-Hs</i> NHA2t Δ1-20 clonning                |
| <i>GFP-Hs</i> NHA2 delta 1-40 F  | ATCCGGACTCAGATCTCGAGCTCAAGCTTCAATTCTATGGATGCAAATGAACCAACAGAAGGA             | <i>pGFP-Hs</i> NHA2t Δ1-40 clonning                |
| <i>GFP-Hs</i> NHA2 delta 1-40 R  | TTTTCAGAAGAATACTTCTTCTGTTGGTTCAATTCATCCATAGAATTCGAAGCTTGAGCT                | <i>pGFP-Hs</i> NHA2t Δ1-40 clonning                |
| <i>GFP-Hs</i> NHA2 delta 1-50 F  | ATCCGGACTCAGATCTCGAGCTCAAGCTTCAATTCTATGCTTCTGAAAAGCAGTGAAAAAAG              | <i>pGFP-Hs</i> NHA2t Δ1-50 clonning                |
| <i>GFP-Hs</i> NHA2 delta 1-50 R  | TTGGTGTCTTGTAGCTTTTTTCACTGCTTTTCAGAAGCATAGAATTCGAAGCTTGAGCT                 | <i>pGFP-Hs</i> NHA2t Δ1-50 clonning                |
| <i>GFP- Hs</i> NHA2 delta 1-60 F | ATCCGGACTCAGATCTCGAGCTCAAGCTTCAATTCTATGAAAACCAACTGAAGCAAATCAC               | <i>pGFP-Hs</i> NHA2t Δ1-60 clonning                |
| <i>GFP-Hs</i> NHA2 delta 1-60 R  | TGTCTCAGTCTTTGTACGTGATTTGCTTCAGTTGGTGTTCATAGAATTCGAAGCTTGAGCT               | <i>pGFP-Hs</i> NHA2t Δ1-60 clonning                |
| <i>GFP Hs</i> NHA2 delta 1-70 F  | ATCCGGACTCAGATCTCGAGCTCAAGCTTCAATTCTATGAGACTGAGACAAATGCTGGC                 | <i>pGFP-Hs</i> NHA2t Δ1-70 clonning                |
| <i>GFP Hs</i> NHA2 delta 1-70 R  | GTAACCATGTGGAGGGCAAGCCAGCATTTGTCTCAGTCTCATAGAATTCGAAGCTTGAGCT               | <i>pGFP-Hs</i> NHA2t Δ1-70 clonning                |
| <i>GFP-Hs</i> NHA2 delta 1-75 F  | ATCCGGACTCAGATCTCGAGCTCAAGCTTCAATTCTATGCTGGCTTGCCTCCACA                     | <i>pGFP-Hs</i> NHA2t Δ1-75 clonning                |
| <i>GFP-Hs</i> NHA2 delta 1-75 R  | TTATGACCCTGTCCAGTAAACCATGTGGAGGGCAAGCCAGCATAGAATTCGAAGCTTGAGCT              | <i>pGFP-Hs</i> NHA2t Δ1-75 clonning                |
| <i>GFP-Hs</i> NHA2 delta 1-80 F  | ATCCGGACTCAGATCTCGAGCTCAAGCTTCAATTCTATGCATGGTTTACTGGACAGGGTC                | <i>pGFP-Hs</i> NHA2t Δ1-80 clonning                |
| <i>GFP-Hs</i> NHA2 delta 1-80 R  | TGATGGTAACATTTGTTATGACCTGTCCAGTAAACCATGCATAGAATTCGAAGCTTGAGCT               | <i>pGFP-Hs</i> NHA2t Δ1-80 clonning                |
| <i>GFP-Hs</i> NHA2 delta 1-90 F  | ATCCGGACTCAGATCTCGAGCTCAAGCTTCAATTCTATGGTTACCATCATTGTTCTTCTGTGG             | <i>pGFP-Hs</i> NHA2t Δ1-90 clonning                |
| <i>GFP-Hs</i> NHA2 delta 1-90 R  | TTGACCAAACACAGCCACAGAAGAACAATGATGGTAACCATAGAATTCGAAGCTTGAGCT                | <i>pGFP-Hs</i> NHA2t Δ1-90 clonning                |
| <i>GFP Hs</i> NHA2 delta 1-110 F | ATCCGGACTCAGATCTCGAGCTCAAGCTTCAATTCTATGCCTGGAGGAAACCTATTTGG                 | <i>pGFP-Hs</i> NHA2t Δ1-110 clonning               |
| <i>GFP Hs</i> NHA2 delta 1-110 R | AATAGAACAGGATTATAAATCCAATAGTTTTCTCCAGGCATAGAATTCGAAGCTTGAGCT                | <i>pGFP-Hs</i> NHA2t Δ1-110 clonning               |
| <i>Hs</i> NHA2 E47A Fw           | AATGAACCAACAGCAGGAAGTATTCTT                                                 | Mutagenesis E47A                                   |
| <i>Hs</i> NHA2 E47A Rev          | AAGAATACTTCTGCTGTTGGTTTATT                                                  | Mutagenesis E47A                                   |
| <i>Hs</i> NHA2 E47K Fw           | AATGAACCAACAAAAGGAAGTATTCTT                                                 | Mutagenesis E47K                                   |
| <i>Hs</i> NHA2 E47K Rev          | AAGAATACTTCTTTTGTGGTTTATT                                                   | Mutagenesis E47K                                   |
| <i>Hs</i> NHA2 E56A Fw           | CTGAAAAGCAGTGCAAAAAAGCTACAA                                                 | Mutagenesis E56A                                   |
| <i>Hs</i> NHA2 E56A Rev          | TTGTAGCTTTTTTGCAGTCTTTTTCAG                                                 | Mutagenesis E56A                                   |
| <i>Hs</i> NHA2 E56K Fw           | CTGAAAAGCAGTAAAAAAAAGCTACAA                                                 | Mutagenesis E56K                                   |
| <i>Hs</i> NHA2 E56K Rev          | TTGTAGCTTTTTTACTGCTTTTTCAG                                                  | Mutagenesis E56K                                   |
| <i>Hs</i> NHA2 KK57-58AA F       | TATTCTTCTGAAAAGCAGTGAAGCAGCACTACAAGAAACACCAACTGAAG                          | Mutagenesis K57A + K58A                            |
| <i>Hs</i> NHA2 KK57-58AA R       | CTTCAGTTGGTGTCTTCTGTAGTGCTGCTTCACTGCTTTTTCAGAAGAATA                         | Mutagenesis K57A + K58A                            |
| <i>Hs</i> NHA2 KK57-58EE F       | TATTCTTCTGAAAAGCAGTGAAGAAGAACTACAAGAAACACCAACTGAAG                          | Mutagenesis K57E + K58E                            |
| <i>Hs</i> NHA2 KK57-58EE R       | CTTCAGTTGGTGTCTTCTGTAGTTCTTCTCACTGCTTTTTCAGAAGAATA                          | Mutagenesis K57E + K58E                            |
| 2μ-CEN6ARS4_for*                 | CGGCATCAGAGCAGATTGACTGAGAGTGACCATAACGCGGGTCTTTTCATCACGTGC                   | Centromeric plasmid construction                   |
| 2μ-CEN6ARS4_rev*                 | TGCTCCTTCTTCTGTTCTTCTGTTCCGAGATTACCGCTTAGGACGGATCGCTTGCC                    | Centromeric plasmid construction                   |
